# Supplementary material for: Exogenous Application of Amino Acids Mitigates the Deleterious Effects of Salt Stress on Soybean Plants
Source: MDPI journal article supplement (doi:10.3390/agronomy12092014), 2022-08-26
Supplement: s1 [file s1]

Archive with 1 entries (1 files):
- agronomy-1845292-supplementary.pdf
