# Supplementary material for: Exogenous Application of Amino Acids Mitigates the Deleterious Effects of Salt Stress on Soybean Plants
Source: MDPI journal article supplement (doi:10.3390/agronomy12092014), 2022-08-26
Supplement: s1 [file s1 › agronomy-1845292-supplementary.pdf]

Table S1. Composition of Commercial amino acid solution VIUSID Agro®

| Composition            | Percentage (%) (m / m) |
|------------------------|------------------------|
| Free amino acids       | 7                      |
| Aspartic acid          | 1.6                    |
| Arginine               | 2.4                    |
| Glycine                | 2.5                    |
| Tryptophan             | 0.5                    |
| Distiller water s.q.f. | 100 mL                 |

Note: All them subject to a biocatalytic process, which increases their effectiveness without altering their properties. The biocatalytic process greatly improves the biological activity and biochemical reactivity of all antioxidant molecules.
